# Supplementary material for: Smartphone-Based Janus Micromotors Strategy for Motion-Based Detection of Glutathione
Source: PubMed Central journal article supplement (PMC8674879; doi:10.1021/acs.analchem.1c02947), 2021-11-22
Supplement: ac1c02947_si_001.pdf [file ac1c02947_si_001.pdf]

## Supporting information

### Smartphone-based Janus micromotors strategy for motion-based detection of glutathione

Kaisong Yuan,<sup>†#</sup> Carmen Cuntín-Abal,<sup>†</sup> Beatriz Jurado-Sánchez,<sup>†\*\*</sup> and Alberto Escarpa<sup>†‡\*</sup>

<sup>†</sup>Department of Analytical Chemistry, Physical Chemistry and Chemical Engineering, University of Alcalá, Alcalá de Henares E-28871, Madrid, Spain. E-mail: beatriz.jurado@uah.es, alberto.escarpa@uah.es (Tel: +34 91 8854995)

<sup>#</sup>Shantou University Medical College, No. 22, Xinling Road, Shantou 515041, China

<sup>\*</sup>Chemical Research Institute "Andrés M. del Río", University of Alcalá, Alcalá de Henares E-28871, Madrid, Spain

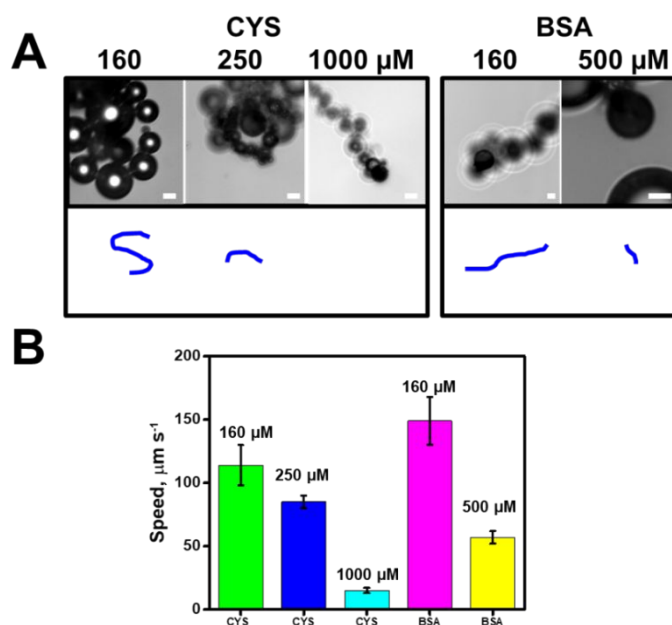

Figure S1. Selectivity of the detection strategy in the presence of high concentrations of CYS and BSA. A) Time-lapse images and corresponding tracking lines of micromotors navigation in solutions containing CYS and BSA. B) Corresponding speed in the presence of the different concentration interferences. Scale bars, 10  $\mu\text{m}$ . Please note that the concentrations assayed are higher than the normally present in human blood, which ranged from 240-360  $\mu\text{M}$  in the case of CYS<sup>1</sup> and 530 to 750  $\mu\text{M}$  in the case of human serum albumin as analogous to BSA<sup>2</sup>.

1. Rehman T., Shabbir M.A., Inam-Ur-Raheem M., Manzoor M.F., Ahmad N.H., Siddeeq A., Abid M., Aadil R.M., Cysteine and homocysteine as biomarker of various diseases, *Food Sci. Nutr.*, **2020**, 8, 4696-4707.

2. Mishra V., Heath R.J., Structural and Biochemical Features of Human Serum Albumin Essential for Eukaryotic Cell Culture, *Int. J. Mol. Sci.*, **2021**, 22, 8411
